# Supplementary material for: Honeycomb-like active microswarms for magnetically tunable cascade enzyme catalysis
Source: Royal Society of Chemistry journal article supplement (doi:10.1039/d2nr00927g), 2022-01-01
Supplement: d2nr00927g1.pdf [file d2nr00927g1.pdf]

## Supporting Information

### **Honeycomb-like active microswarm for magnetic-tunable cascade enzyme catalysis**

*Ruirui Guo#, Dong Liu#, Yanjie Huang, Bin Wang, Jian Dong\*, Yuan Lu\**

\*Corresponding authors. Email: yuanlu@tsinghua.edu.cn (Y. Lu),

dongjian@tust.edu.cn (J. Dong)

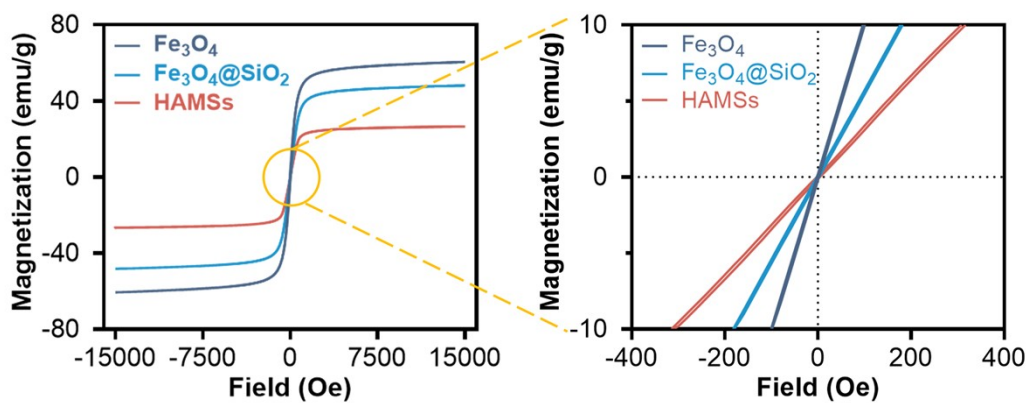

**Figure S1.** Magnetic hysteresis loops of Fe<sub>3</sub>O<sub>4</sub>, Fe<sub>3</sub>O<sub>4</sub>@nSiO<sub>2</sub>, and HAMSs

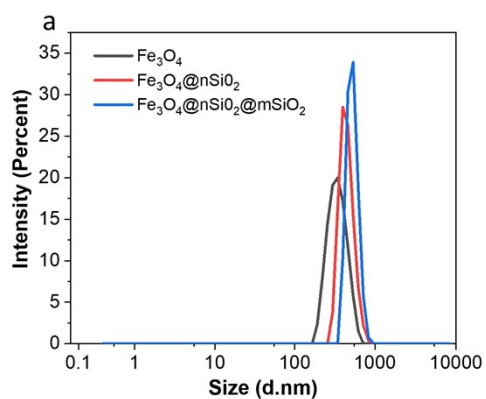

b

| Materials                                           | Average particle size |
|-----------------------------------------------------|-----------------------|
| $\text{Fe}_3\text{O}_4$                             | 295nm                 |
| $\text{Fe}_3\text{O}_4@\text{nSiO}_2$               | 396nm                 |
| $\text{Fe}_3\text{O}_4@\text{nSiO}_2@\text{mSiO}_2$ | 532nm                 |

**Figure S2.** (a) Size distribution of  $\text{Fe}_3\text{O}_4$ ,  $\text{Fe}_3\text{O}_4@\text{nSiO}_2$ , and  $\text{Fe}_3\text{O}_4@\text{nSiO}_2@\text{mSiO}_2$  nanoparticles by intensity. (b) Average particle size of  $\text{Fe}_3\text{O}_4$ ,  $\text{Fe}_3\text{O}_4@\text{nSiO}_2$ , and  $\text{Fe}_3\text{O}_4@\text{nSiO}_2@\text{mSiO}_2$  nanoparticles.

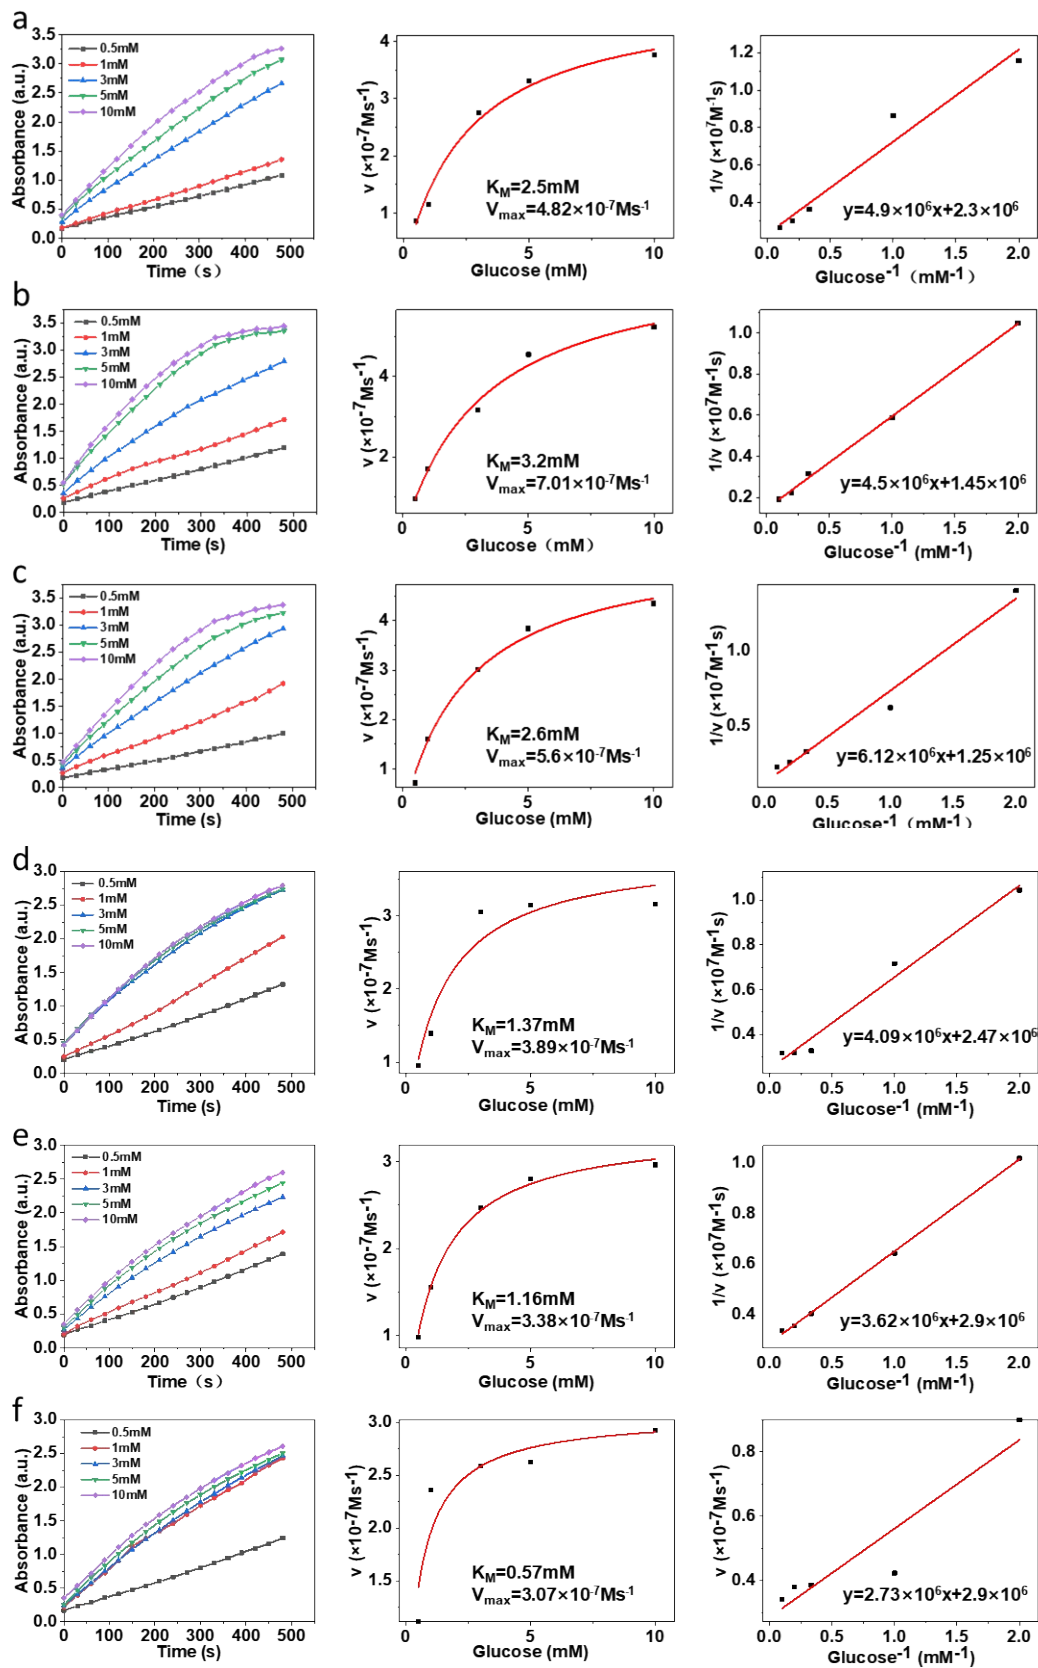

**Figure S3.** a) The absorbance curve of oxTMB catalyzed at 652 nm with time under different concentrations of  $\text{H}_2\text{O}_2$  at  $\text{pH}=4.2$ , Michaelis-Menten kinetic analysis and

Lineweaver-Burk curve for the reaction of HAMSs with  $\text{H}_2\text{O}_2$  as substrate, b) The absorbance curve of oxTMB catalyzed at 652 nm with time under different concentrations of  $\text{H}_2\text{O}_2$  at pH=5.2, Michaelis-Menten kinetic analysis and Lineweaver-Burk curve for the reaction of HAMSs with  $\text{H}_2\text{O}_2$  as substrate, c) The absorbance curve of oxTMB catalyzed at 652 nm with time under different concentrations of  $\text{H}_2\text{O}_2$  at pH=6.3, Michaelis-Menten kinetic analysis and Lineweaver-Burk curve for the reaction of HAMSs with  $\text{H}_2\text{O}_2$  as substrate, d) The absorbance curve of oxTMB catalyzed at 652 nm with time under different concentrations of  $\text{H}_2\text{O}_2$  at pH=7.4, Michaelis-Menten kinetic analysis and Lineweaver-Burk curve for the reaction of HAMSs with  $\text{H}_2\text{O}_2$  as substrate, e) The absorbance curve of oxTMB catalyzed at 652 nm with time under different concentrations of  $\text{H}_2\text{O}_2$  at pH=8.8, Michaelis-Menten kinetic analysis and Lineweaver-Burk curve for the reaction of HAMSs with  $\text{H}_2\text{O}_2$  as substrate, f) The absorbance curve of oxTMB catalyzed at 652 nm with time under different concentrations of  $\text{H}_2\text{O}_2$  at pH=9.8, Michaelis-Menten kinetic analysis and Lineweaver-Burk curve for the reaction of HAMSs with  $\text{H}_2\text{O}_2$  as substrate,

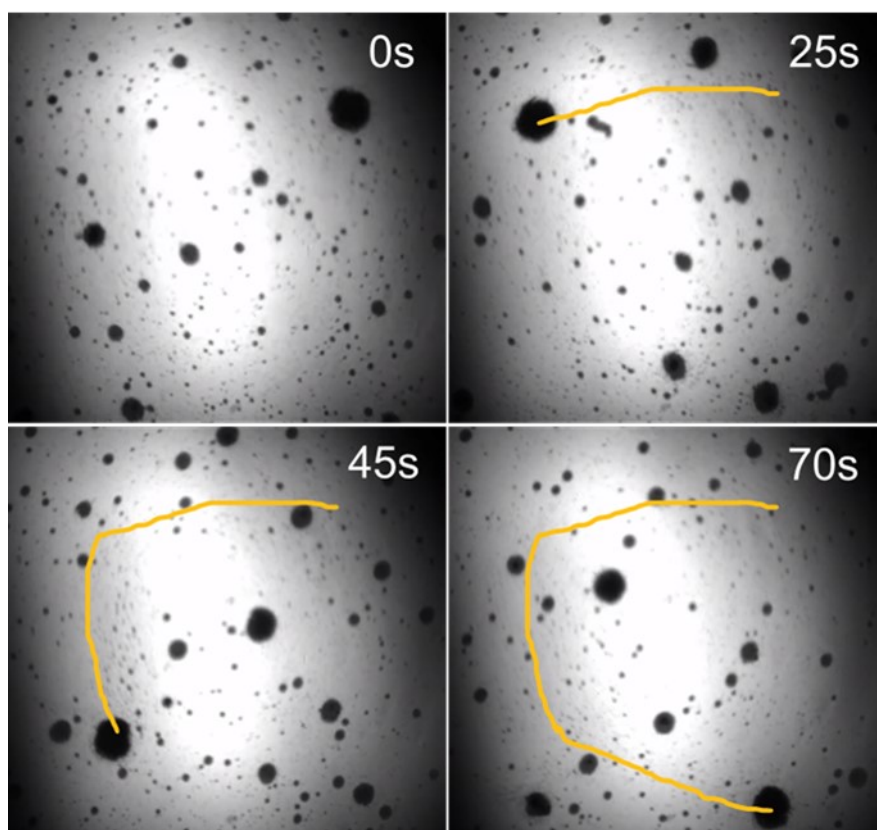

**Figure S4.** The C-shaped trajectory of HAMSs in aqueous solution.

**Movie S1.** C-shaped trajectory of HAMSs under 3D magnetic field.

**Movie S2.** Z-shaped trajectory of HAMSs under 3D magnetic field.

**Movie S3.** C-shaped trajectory of HAMSs under 3D magnetic field.

**Movie S4.** Movement of HAMSs in complex channel and targeted catalysis of ABTS
